# Supplementary material for: Placenta-derived proteins across gestation in healthy pregnancies—a novel approach to assess placental function?
Source: PubMed Central journal article supplement (PMC9248112; doi:10.1186/s12916-022-02415-z), 2022-07-01

### Low-density lipoprotein receptor-related protein 2

Entrez gene symbol: LRP2

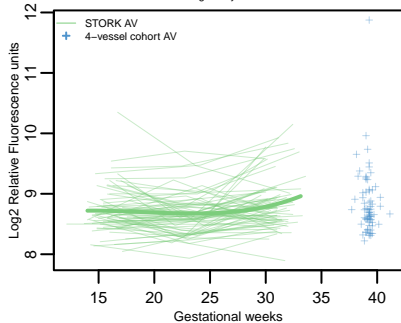

### Heat shock protein beta-1

Entrez gene symbol: HSPB1

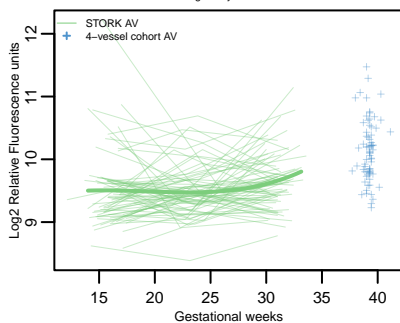

### Collagen alpha-3(VI) chain

Entrez gene symbol: COL6A3

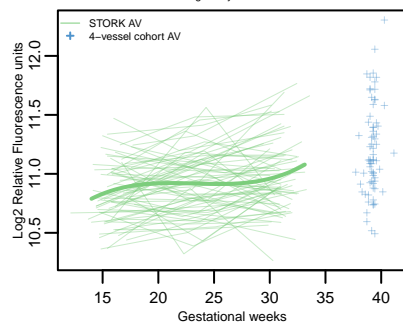

### 60S ribosomal protein L30

Entrez gene symbol: RPL30

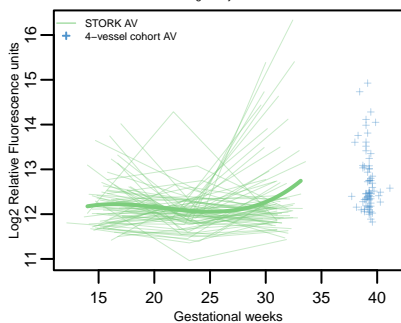

### Tripeptidyl-peptidase 1

Entrez gene symbol: TPP1

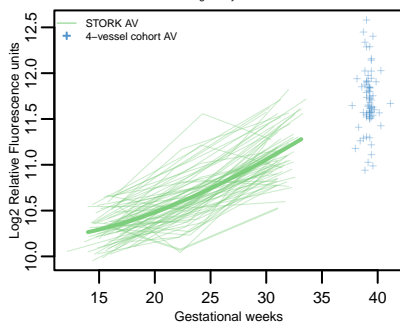

### Astrocytic phosphoprotein PEA-15

Entrez gene symbol: PEA15

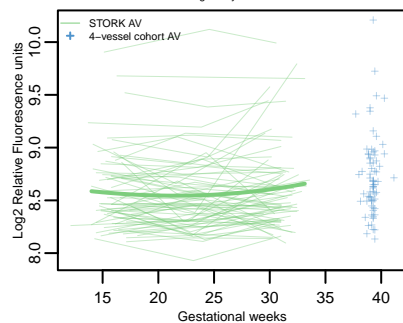

**Gremlin-1**

Entrez gene symbol: GREM1

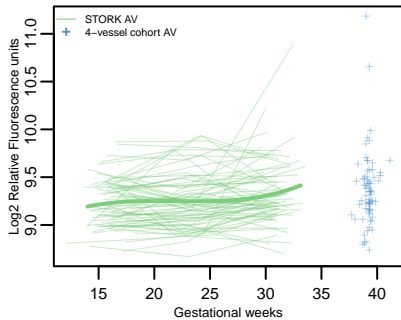**SH2 domain-containing protein 1A**

Entrez gene symbol: SH2D1A

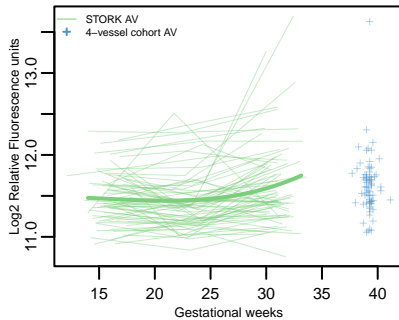**Tyrosine-protein kinase transmembrane receptor ROR2**

Entrez gene symbol: ROR2

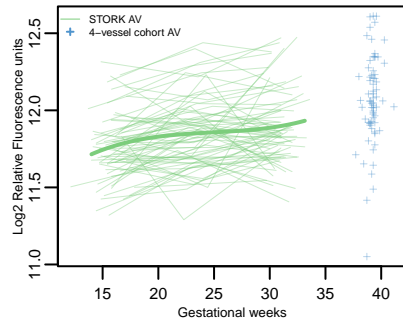**Endoplasmic reticulum lectin 1**

Entrez gene symbol: ERLEC1

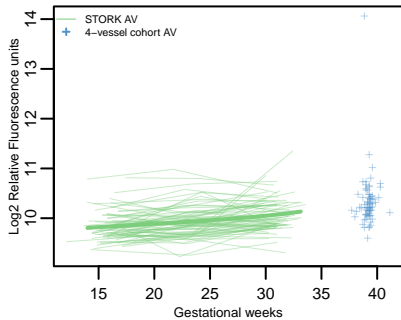**Transmembrane protein 106A**

Entrez gene symbol: TMEM106A

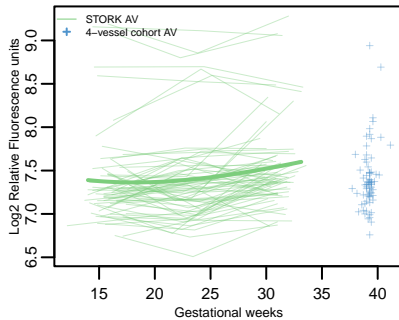**Heat shock 70 kDa protein 1A**

Entrez gene symbol: HSPA1A

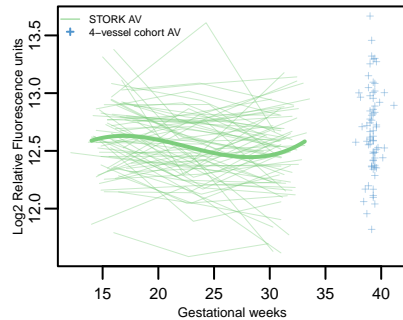

### Growth hormone variant

Entrez gene symbol: GH2

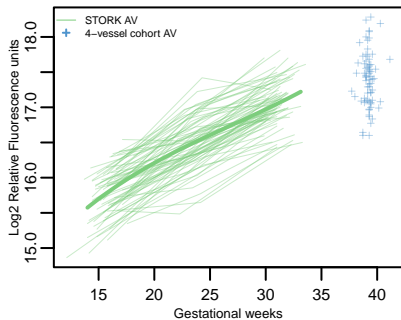

### DnaJ homolog subfamily B member 9

Entrez gene symbol: DNAJB9

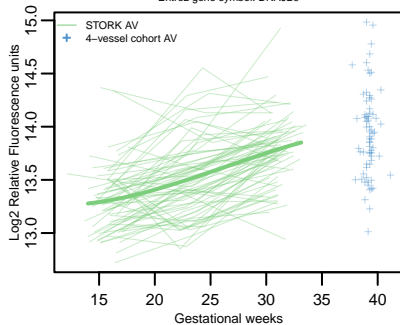

### Keratin, type II cytoskeletal 7

Entrez gene symbol: KRT7

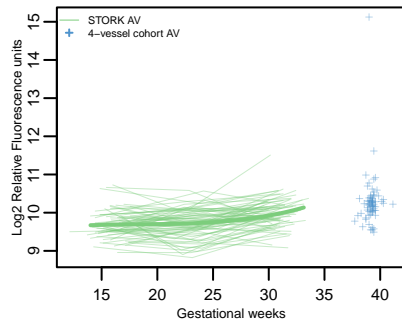

### Coiled-coil domain-containing protein 50

Entrez gene symbol: CCDC50

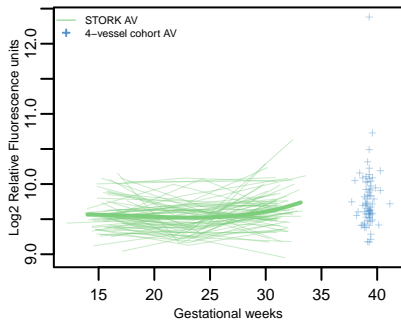

### High mobility group protein B3

Entrez gene symbol: HMGB3

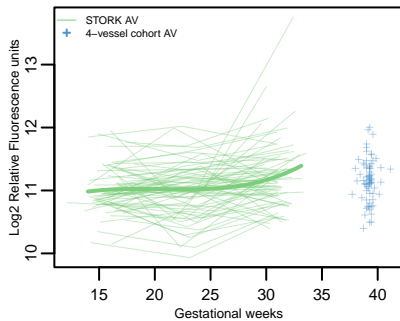

### Serine/arginine-rich splicing factor 7

Entrez gene symbol: SRSF7

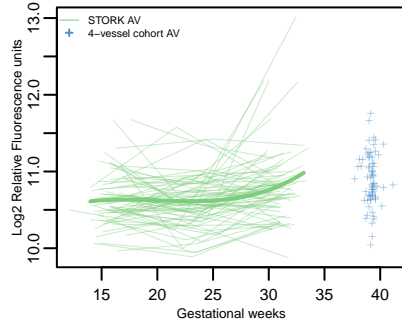

### Chorionic somatomammotropin hormone

Entrez gene symbol: CSH1 CSH2

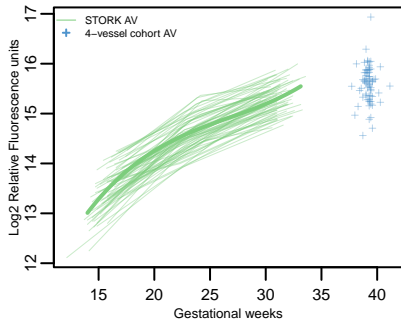

### NHP2-like protein 1

Entrez gene symbol: NHP2L1

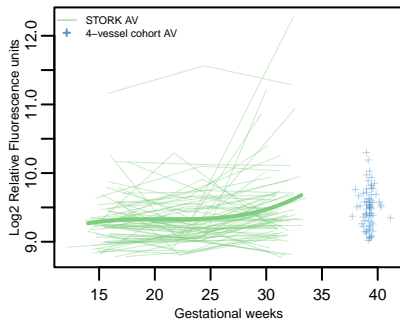

### Protein S100-A10

Entrez gene symbol: S100A10

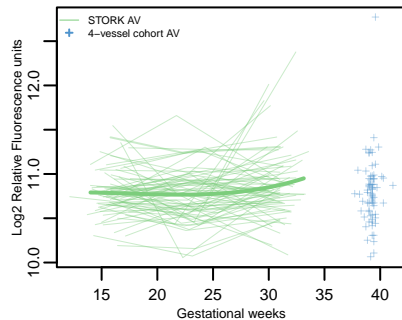

### Amiloride-sensitive amine oxidase [copper-containing]

Entrez gene symbol: AOC1

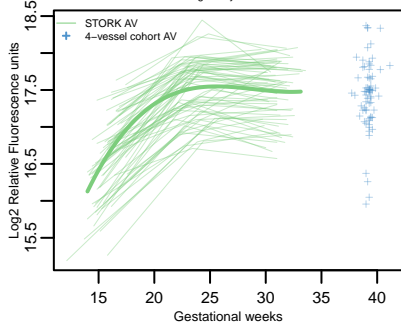

### SPARC-related modular calcium-binding protein 2

Entrez gene symbol: SMOC2

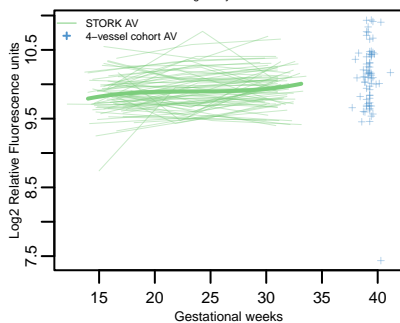

### Vascular endothelial growth factor receptor 1

Entrez gene symbol: FLT1

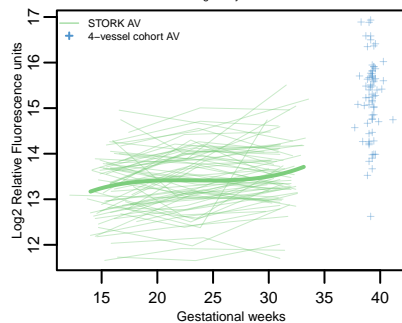

### Interferon-induced GTP-binding protein Mx1

Entrez gene symbol: MX1

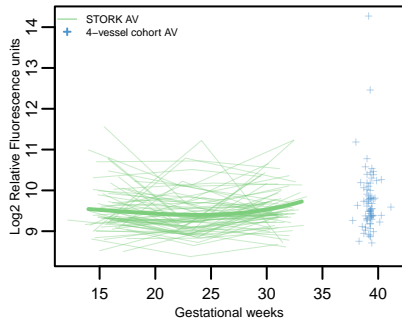

### Signal recognition particle 14 kDa protein

Entrez gene symbol: SRP14

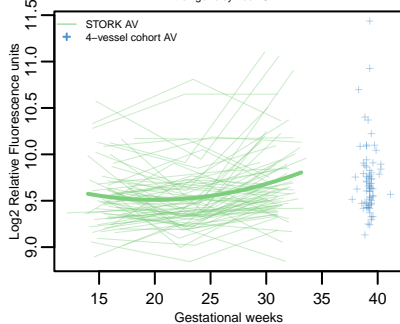

### G antigen 2D

Entrez gene symbol: GAGE2D

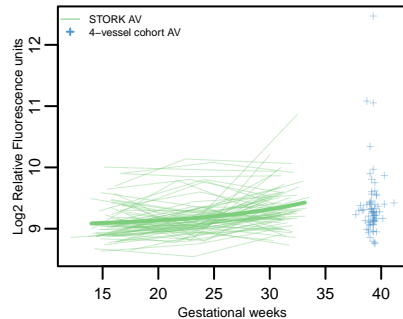

### Inhibin beta A chain:Inhibin beta C chain heterodimer

Entrez gene symbol: INHBA INHBC

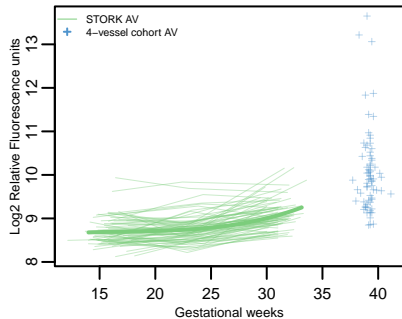

### Protein-glutamine gamma-glutamyltransferase 2

Entrez gene symbol: TGM2

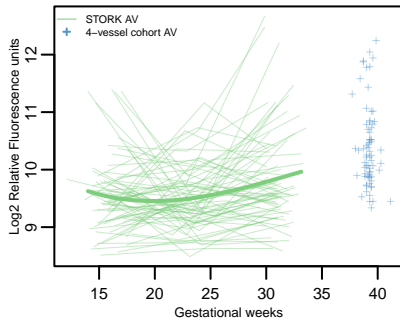

### Heat shock protein beta-6

Entrez gene symbol: HSPB6

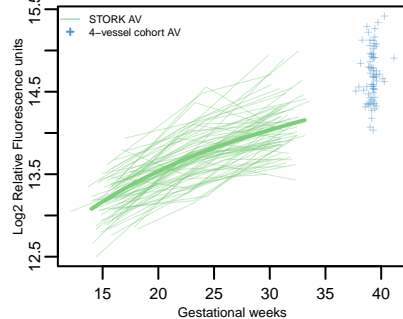

### Proline-serine-threonine phosphatase-interacting protein 1

Entrez gene symbol: PSTPIP1

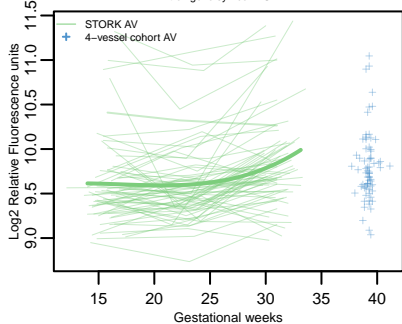

### Homeodomain-only protein

Entrez gene symbol: HOPX

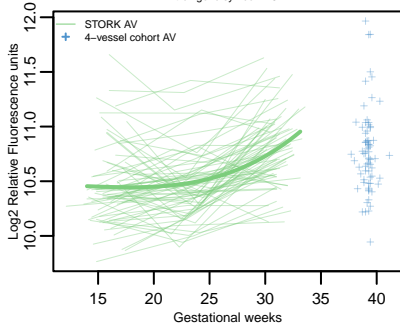

### Nicotinamide N-methyltransferase

Entrez gene symbol: NNMT

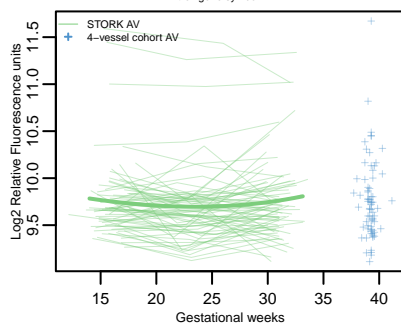

### Epidermal growth factor receptor variant III

Entrez gene symbol: EGFR

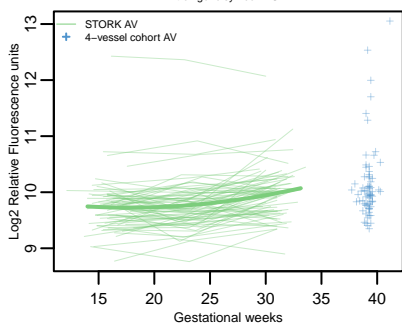

### Activin A

Entrez gene symbol: INHBA

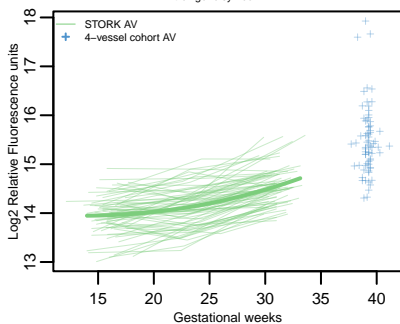

### Corticoliberin

Entrez gene symbol: CRH

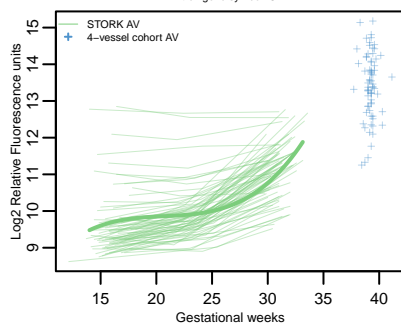

### Midkine

Entrez gene symbol: MDK

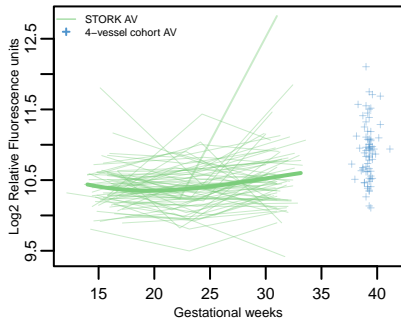

### Plasminogen activator inhibitor 1

Entrez gene symbol: SERPINE1

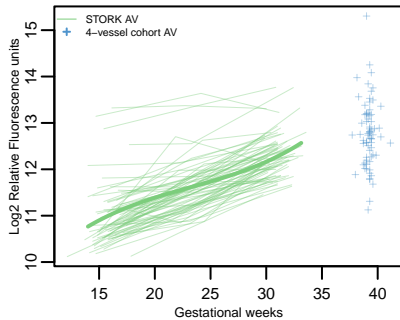

### Pleiotrophin

Entrez gene symbol: PTN

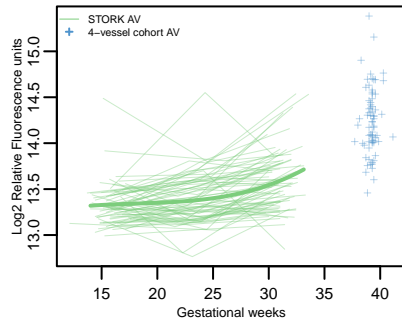

### Placenta growth factor

Entrez gene symbol: PGF

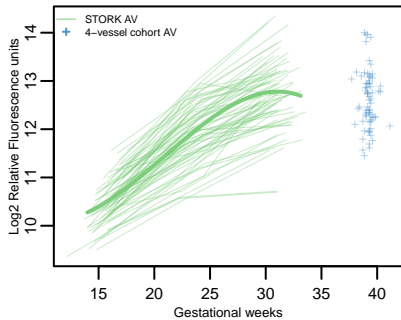

### Diablo homolog, mitochondrial

Entrez gene symbol: DIABLO

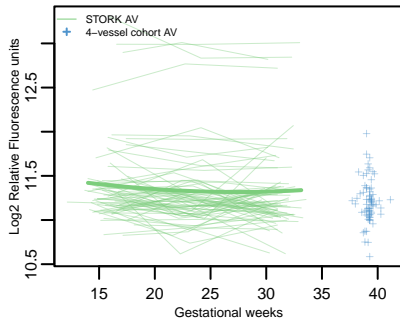

### Biglycan

Entrez gene symbol: BGN

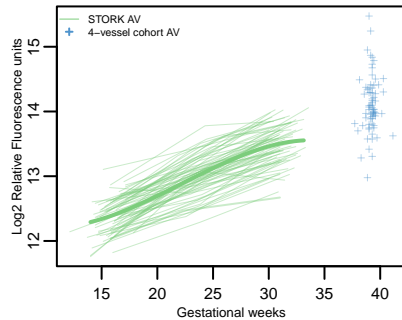

### Tissue factor pathway inhibitor

Entrez gene symbol: TFPI

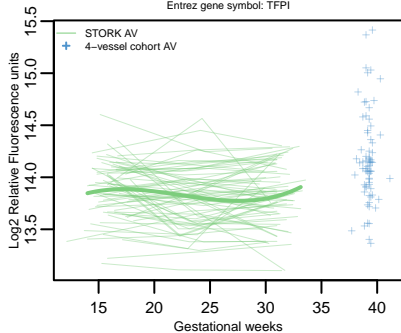

### Legumain

Entrez gene symbol: LGMN

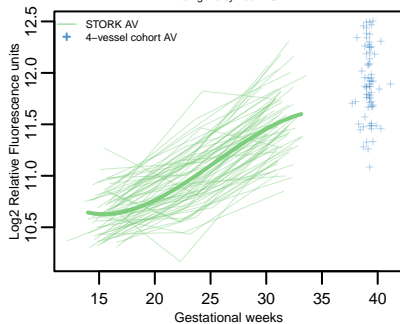

### C-X-C motif chemokine 10

Entrez gene symbol: CXCL10

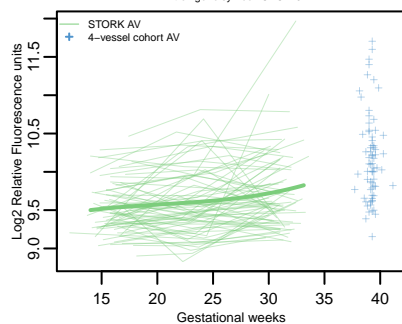

### Glypican-3

Entrez gene symbol: GPC3

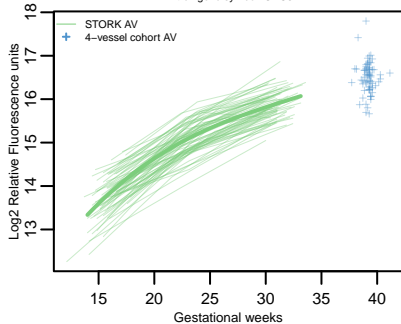

### Glutathione S-transferase A3

Entrez gene symbol: GSTA3

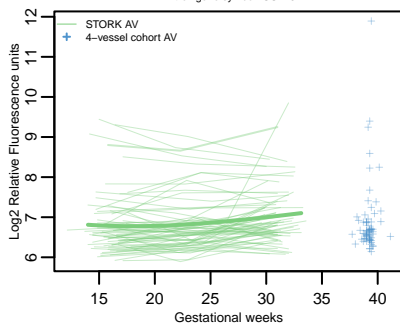

### Mitogen-activated protein kinase 13

Entrez gene symbol: MAPK13

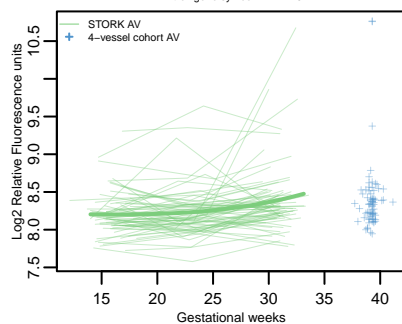



### Ras GTPase-activating protein 1

Entrez gene symbol: RASA1

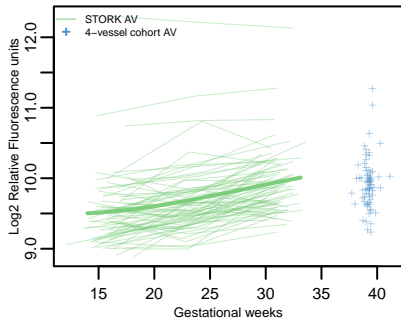

### Corticoliberin

Entrez gene symbol: CRH

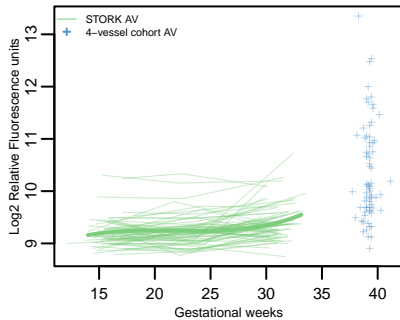

### Poly(U)-specific endoribonuclease

Entrez gene symbol: ENDOU

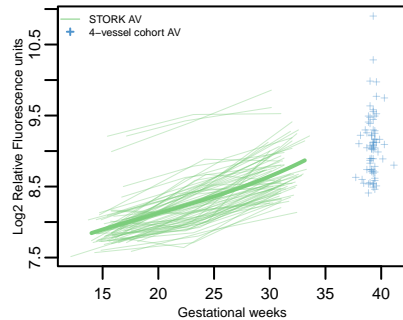

### Carboxypeptidase Z

Entrez gene symbol: CPZ

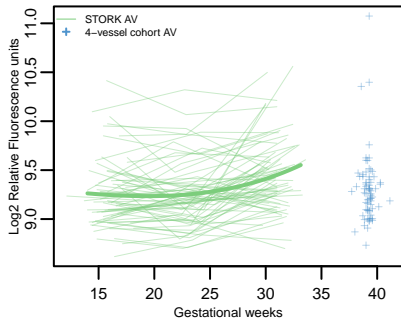

### Matrix Gla protein

Entrez gene symbol: MGP

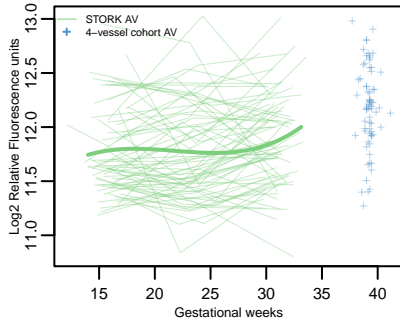

### Protocadherin gamma-A12

Entrez gene symbol: PCDHGA12

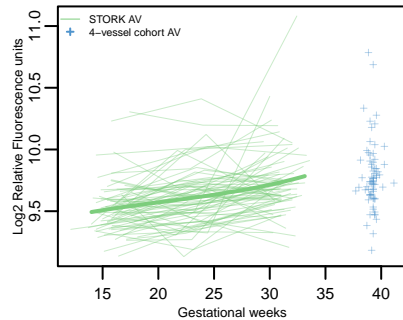

### Protein FAM19A3

Entrez gene symbol: FAM19A3

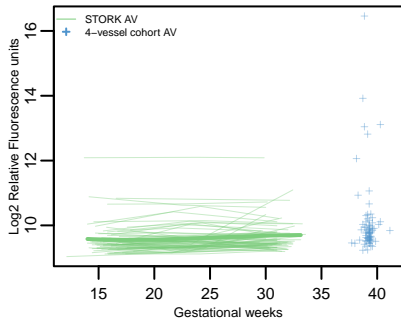

### Adrenomedullin

Entrez gene symbol: ADM

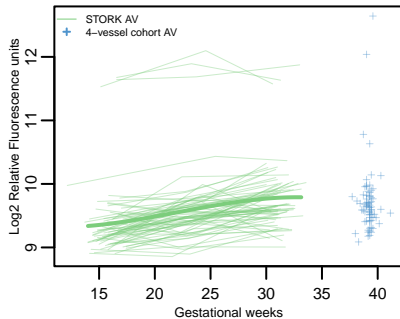

### Vascular endothelial growth factor receptor 1

Entrez gene symbol: FLT1

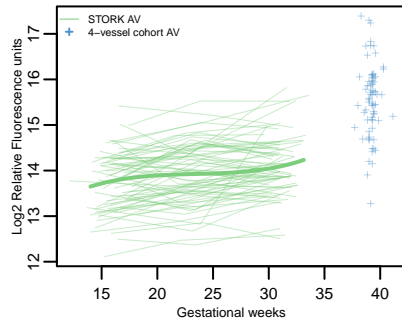

### Inter-alpha-trypsin inhibitor heavy chain H5

Entrez gene symbol: ITIH5

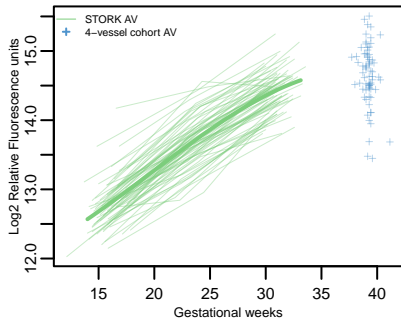

### 39S ribosomal protein L21, mitochondrial

Entrez gene symbol: MRPL21

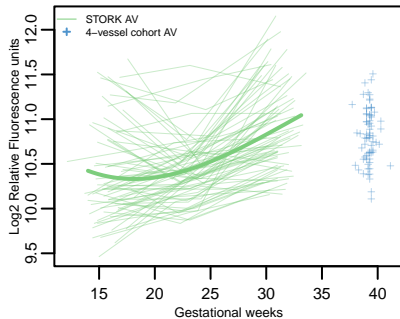

### Platelet-derived growth factor receptor-like protein

Entrez gene symbol: PDGFR\_L

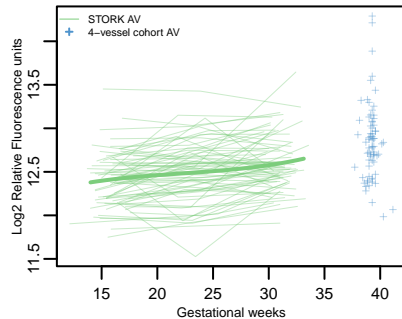

### Keratin, type II cytoskeletal 1

Entrez gene symbol: KRT1

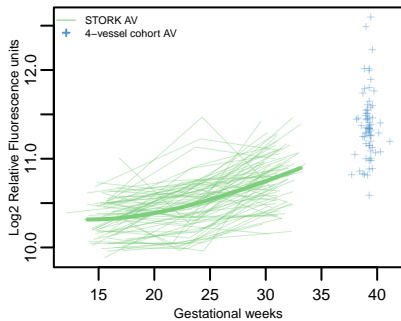

### Coxsackievirus and adenovirus receptor

Entrez gene symbol: CXADR

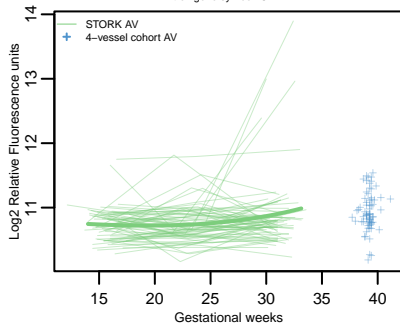

### Chloride intracellular channel protein 5

Entrez gene symbol: CLIC5

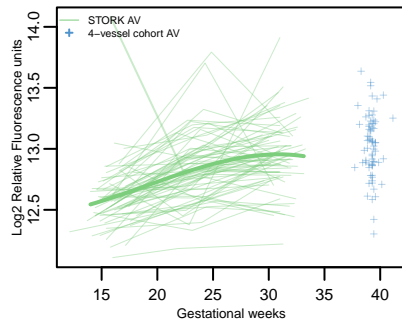

### R-spondin-3

Entrez gene symbol: RSPO3

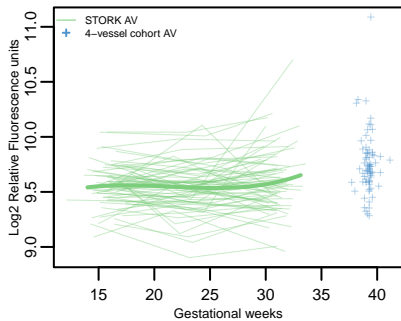

### Inhibin beta A chain

Entrez gene symbol: INHBA

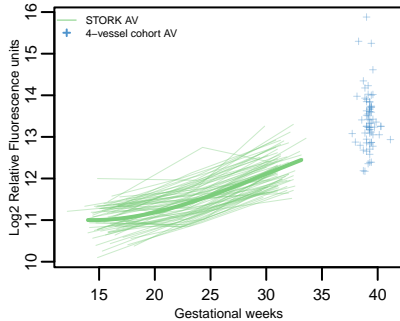

### Secreted frizzled-related protein 3

Entrez gene symbol: FRZB

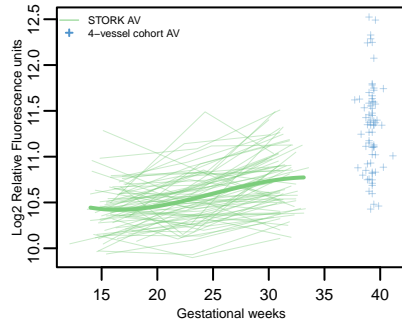

### Protein kinase C and casein kinase substrate in neurons protei

Entrez gene symbol: PACSIN3

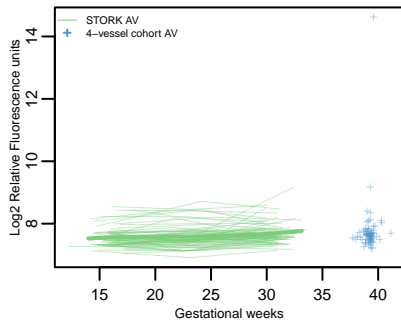

### Cysteine-rich motor neuron 1 protein

Entrez gene symbol: CRIM1

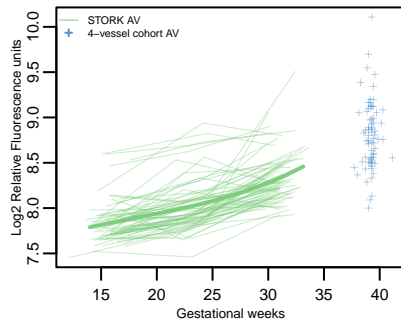

### Fibroblast growth factor-binding protein 1

Entrez gene symbol: FGFBP1

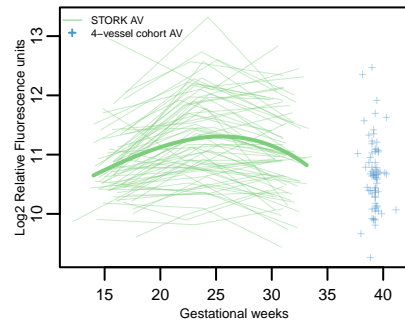

### Dickkopf-related protein 2

Entrez gene symbol: DKK2

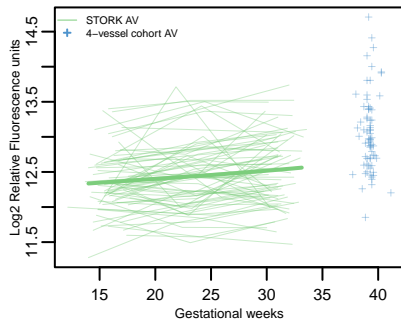

### R-spondin-1

Entrez gene symbol: RSPO1

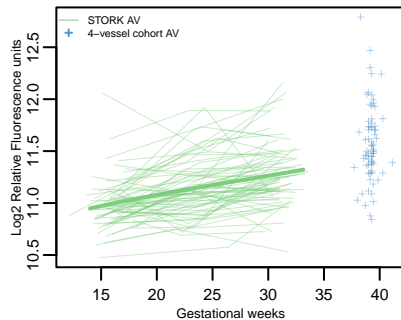

### Signal peptide, CUB and EGF-like domain-containing protein

Entrez gene symbol: SCUBE3

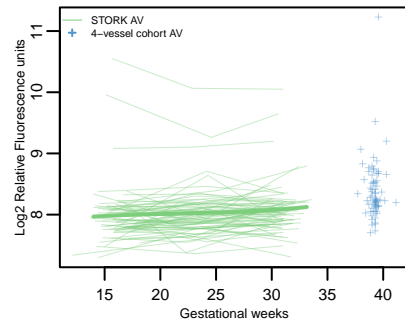

### Protein S100-A16

Entrez gene symbol: S100A16

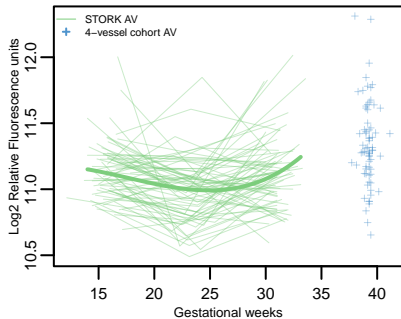

### Selenoprotein W

Entrez gene symbol: SEPW1

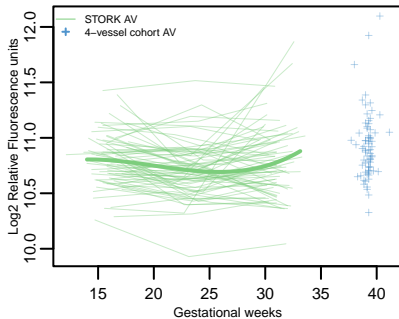

### NADH-cytochrome b5 reductase 2

Entrez gene symbol: CYB5R2

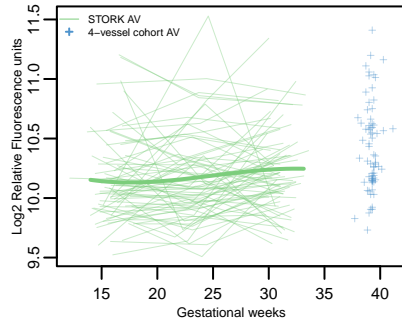

### Glia-derived nexin

Entrez gene symbol: SERPINE2

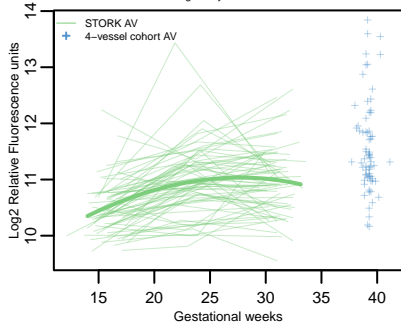

### Retinol-binding protein 1

Entrez gene symbol: RBP1

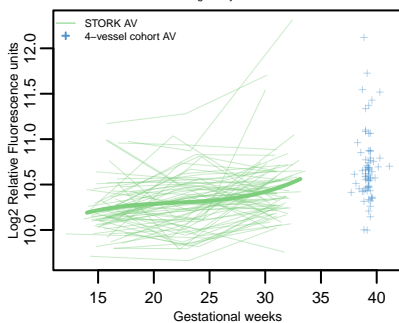

### Fibroblast growth factor 9

Entrez gene symbol: FGF9

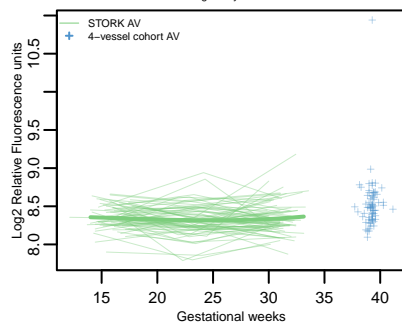

### Ankyrin repeat and SOCS box protein 9

Entrez gene symbol: ASB9

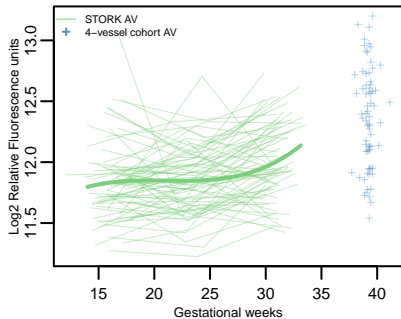

### Metalloproteinase inhibitor 3

Entrez gene symbol: TIMP3

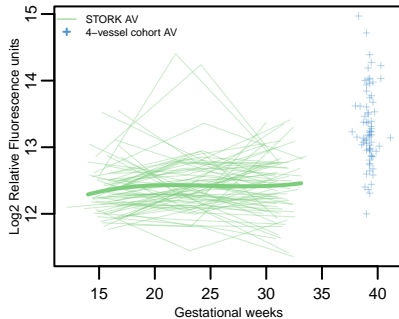

### Kunitz-type protease inhibitor 2

Entrez gene symbol: SPINT2

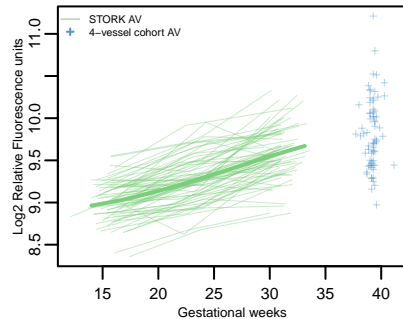

### Secreted frizzled-related protein 1

Entrez gene symbol: SFRP1

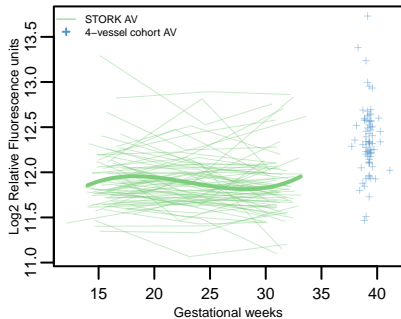

### Dickkopf-related protein 4

Entrez gene symbol: DKK4

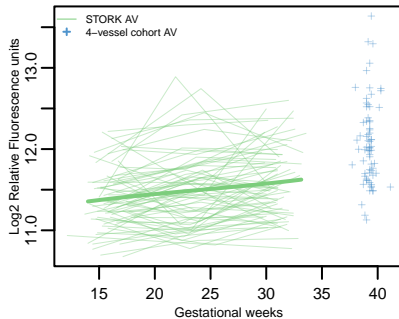

### Fibroblast growth factor 1

Entrez gene symbol: FGF1

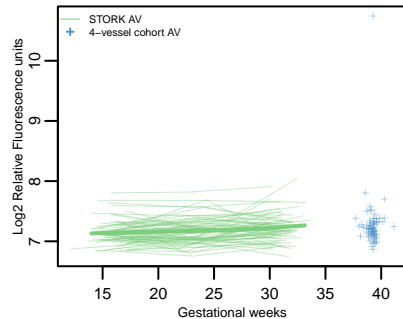

### Dickkopf-related protein 1

Entrez gene symbol: DKK1

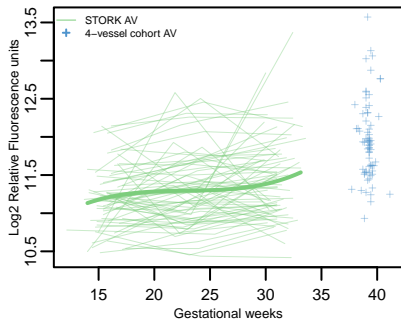

### Angiotensin-related protein 4

Entrez gene symbol: ANGPL4

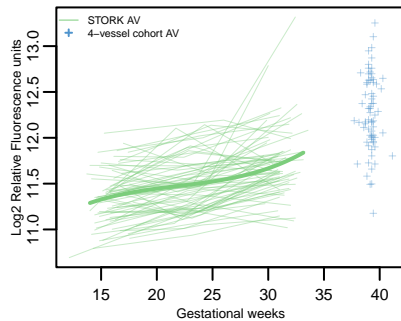

### Urokinase-type plasminogen activator

Entrez gene symbol: PLAU

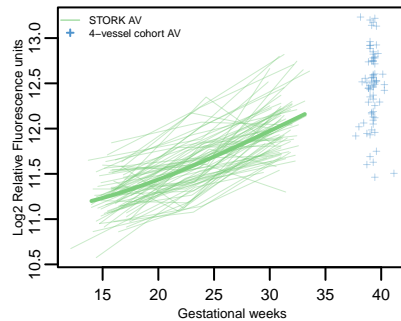

### Interleukin-6

Entrez gene symbol: IL6

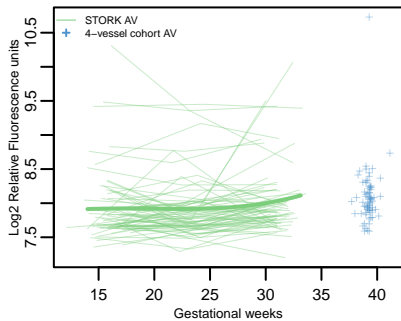

### Gremlin-2

Entrez gene symbol: GREM2

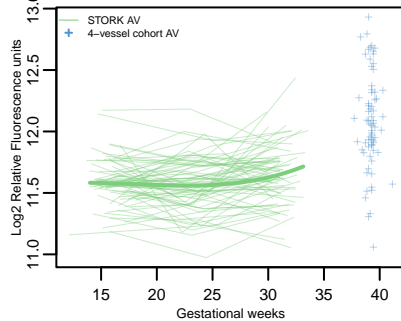

### Protocadherin gamma-A10

Entrez gene symbol: PCDHGA10

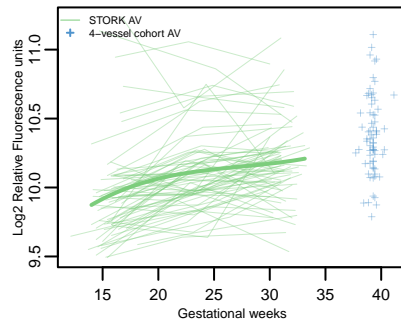

### Early placenta insulin-like peptide

Entrez gene symbol: INSL4

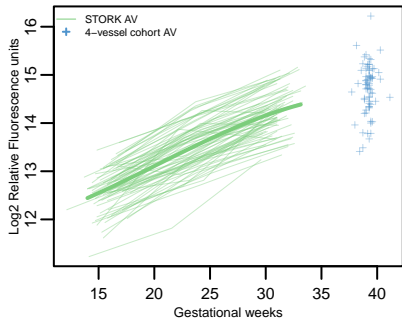

### PolyUbiquitin K63-linked

Entrez gene symbol: UBC

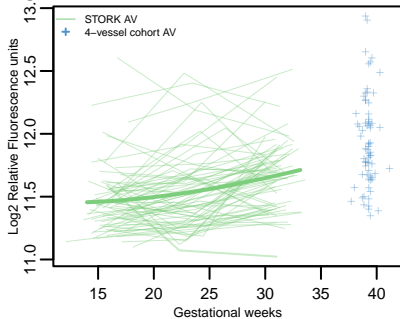

### Netrin-1

Entrez gene symbol: NTN1

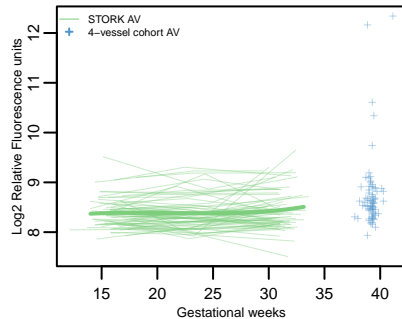

### Kazal-type serine protease inhibitor domain-containing protei

Entrez gene symbol: KAZALD1

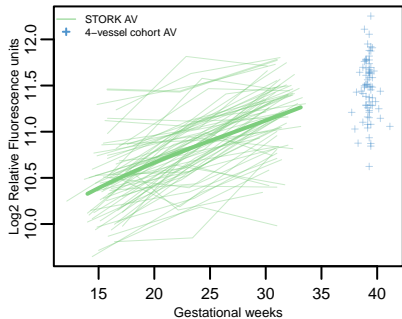

### V-set and immunoglobulin domain-containing protein 2

Entrez gene symbol: VSIG2

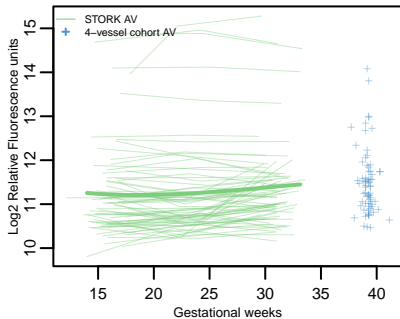

### Fatty-acid amide hydrolase 2

Entrez gene symbol: FAAH2

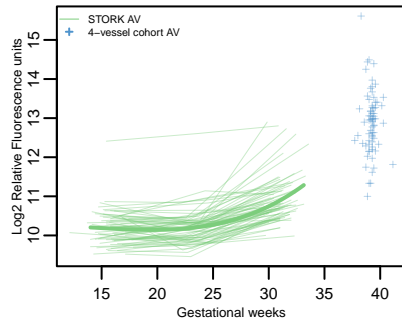



### R-spondin-3

Entrez gene symbol: RSPO3

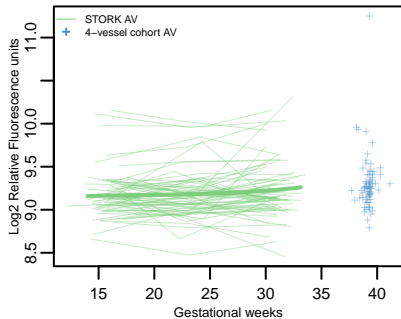

### Inhibin beta A chain:Inhibin beta B chain heterodimer

Entrez gene symbol: INHBA INHBB

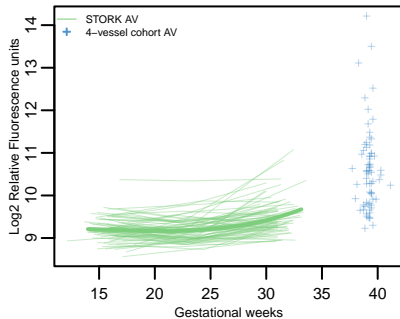

### Noggin

Entrez gene symbol: NOG

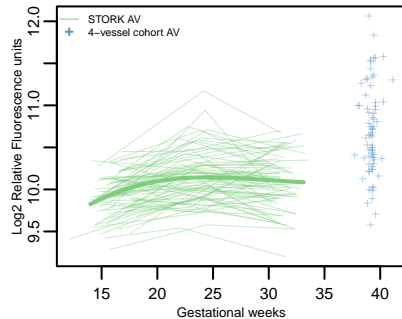

### Tissue factor pathway inhibitor 2

Entrez gene symbol: TFPI2

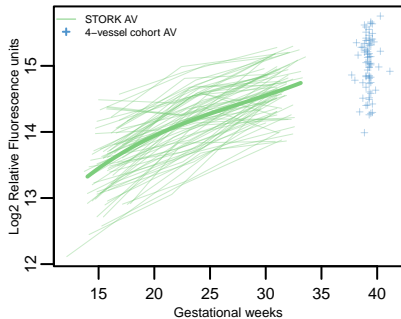

### NAD(P)H dehydrogenase [quinone] 1

Entrez gene symbol: NQO1

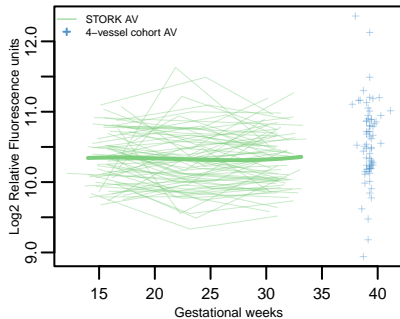

Supplement: 12916_2022_2415_MOESM4_ESM.pdf [file 12916_2022_2415_MOESM4_ESM.pdf]
